# Supplementary material
Source: publisher figshare collection journal article supplement (https://tandf.figshare.com/ndownloader/files/17422079)
Supplement: Supplementary file 1 [file 17422079]

**Online Supplementary Material
________________________________________

Passive personal air sampling of dust in a working environment – a pilot study**

**Mariam Shirdel1, Ingvar A. Bergdahl1, Britt M. Andersson2, Håkan Wingfors3, Johan N. Sommar1 and Ingrid E. Liljelind1**

1Occupational and Environmental Medicine, Department of Public Health and Clinical Medicine, Umeå University, SE-901 87 Umeå, Sweden

2Department of Applied Physics and Electronics, Umeå University, SE-901 87 Umeå, Sweden

3Swedish Defence Research Agency, CBRN Defence & Security Division, Cementvägen 20, SE-901 82 Umeå, Sweden

**Supplementary Data**

Images from elemental mapping of particles on the collection surface of the UNC sampler with an energy dispersive spectroscopy detector (EDS) in a scanning electron microscope (SEM) are shown in Figures 1 and 2. Two different examples are shown to provide an illustration of how the images from elemental mapping appear. Figure S1 consists of one big particle and Figure S2 consists of an agglomerate of particles.


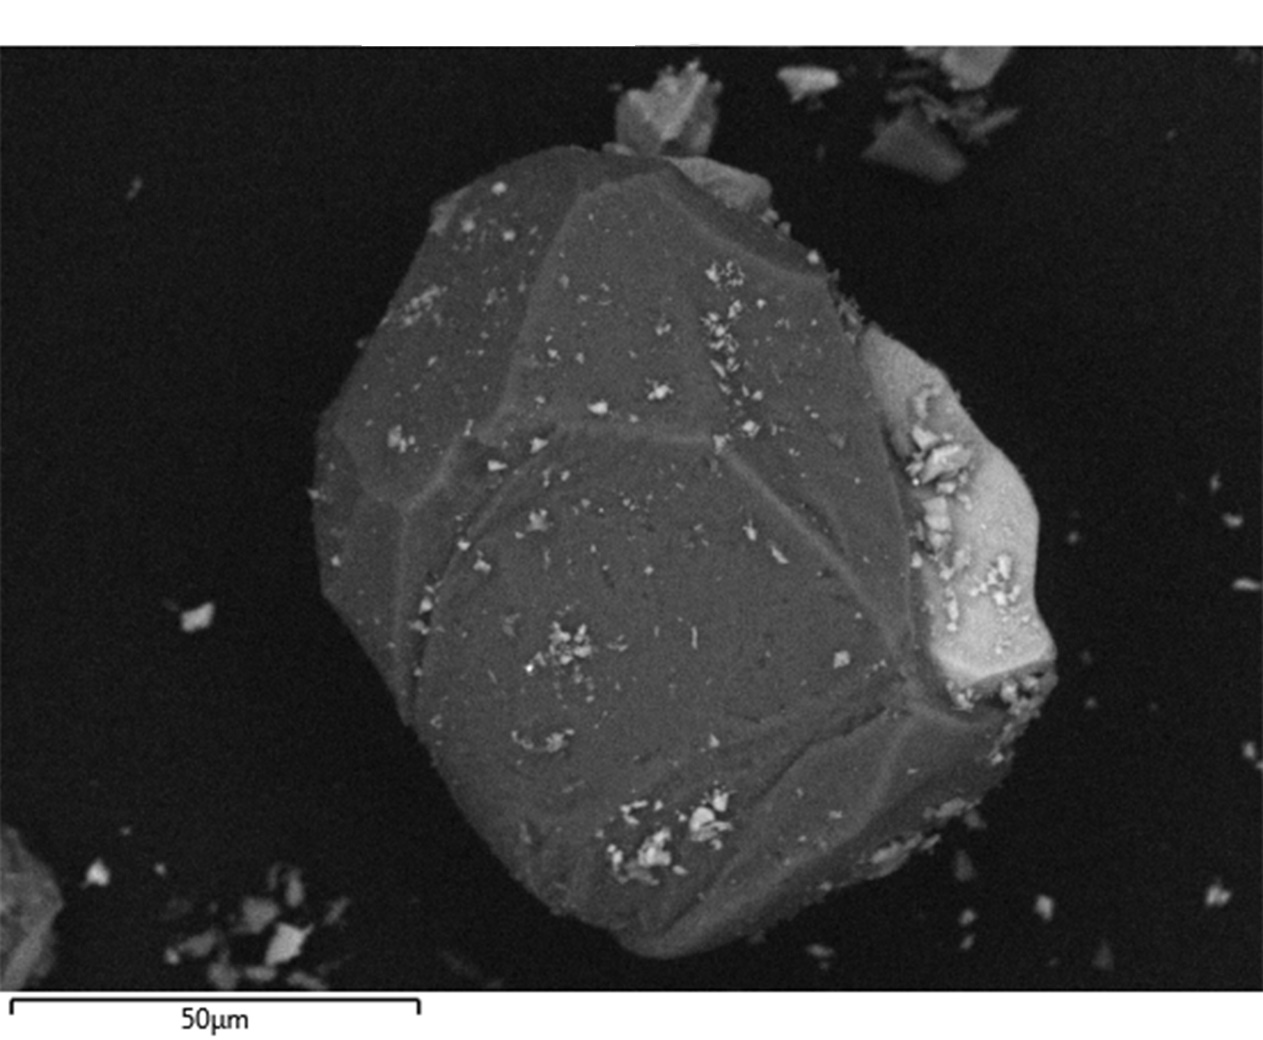


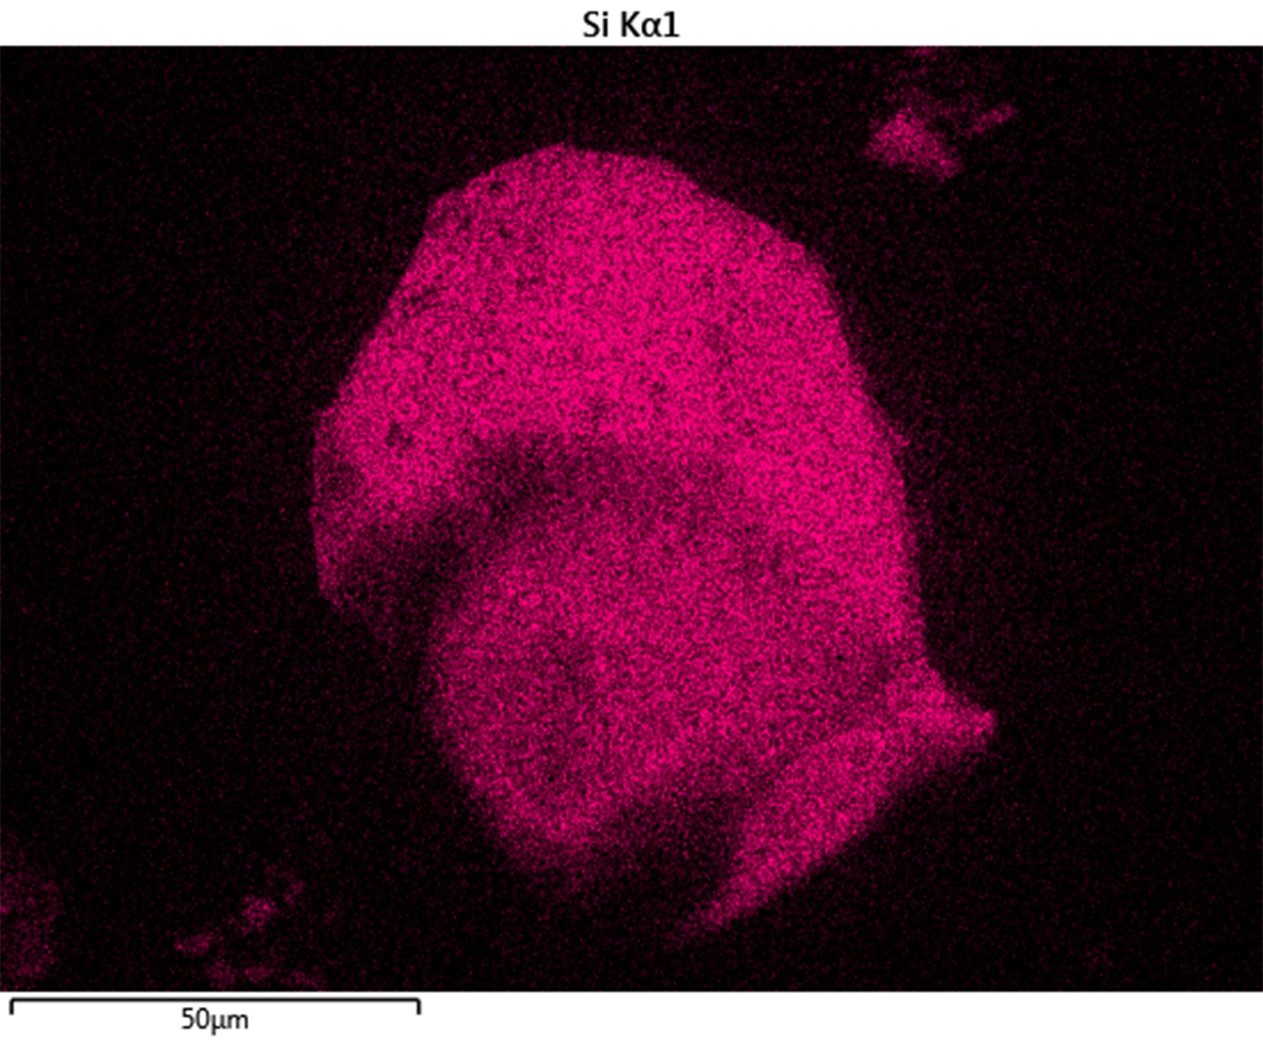


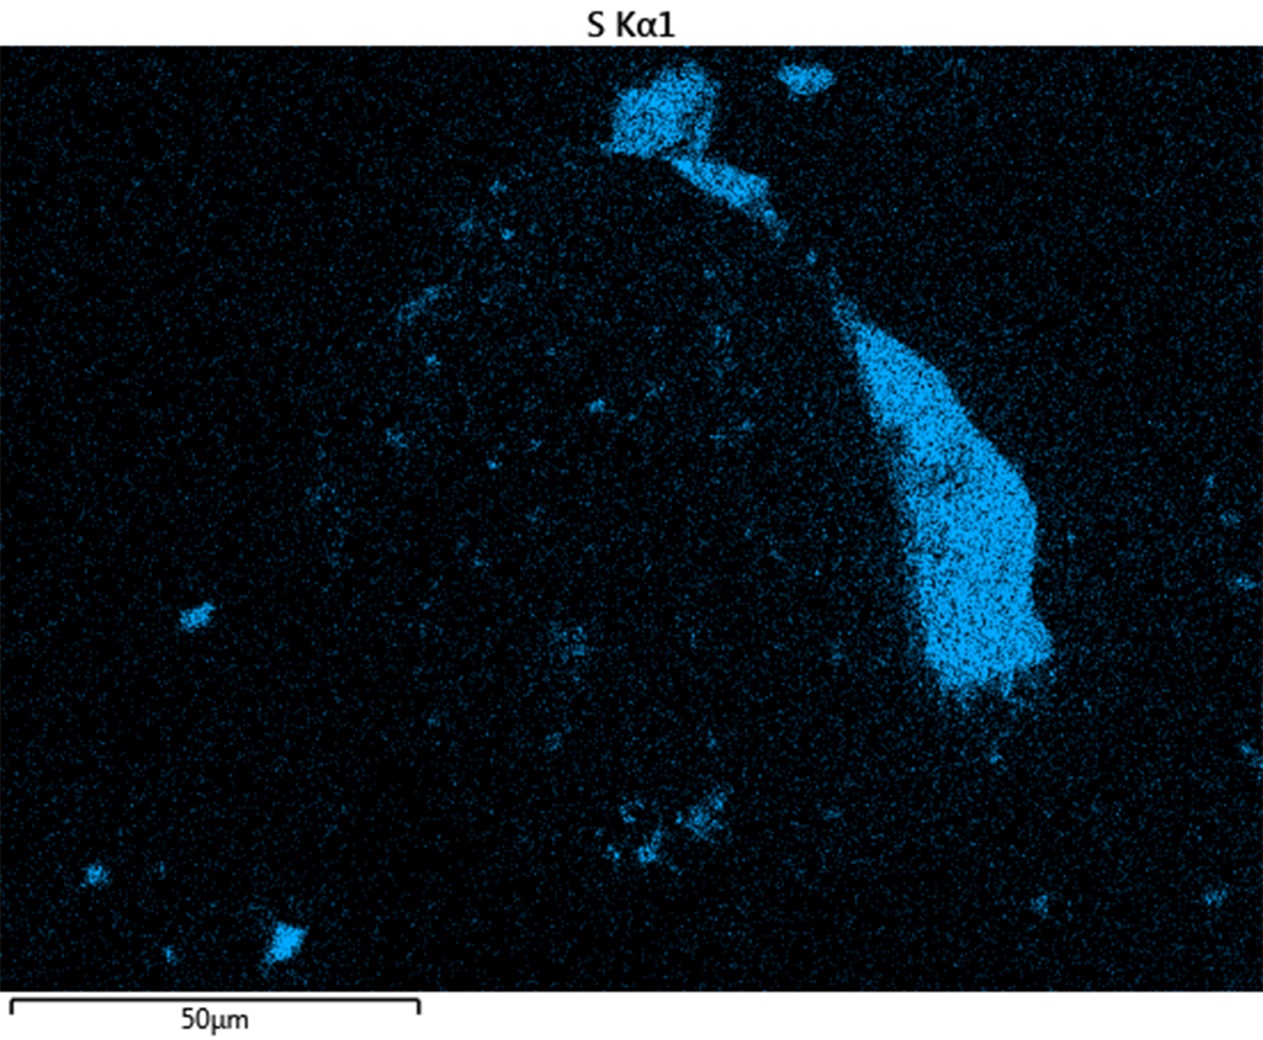


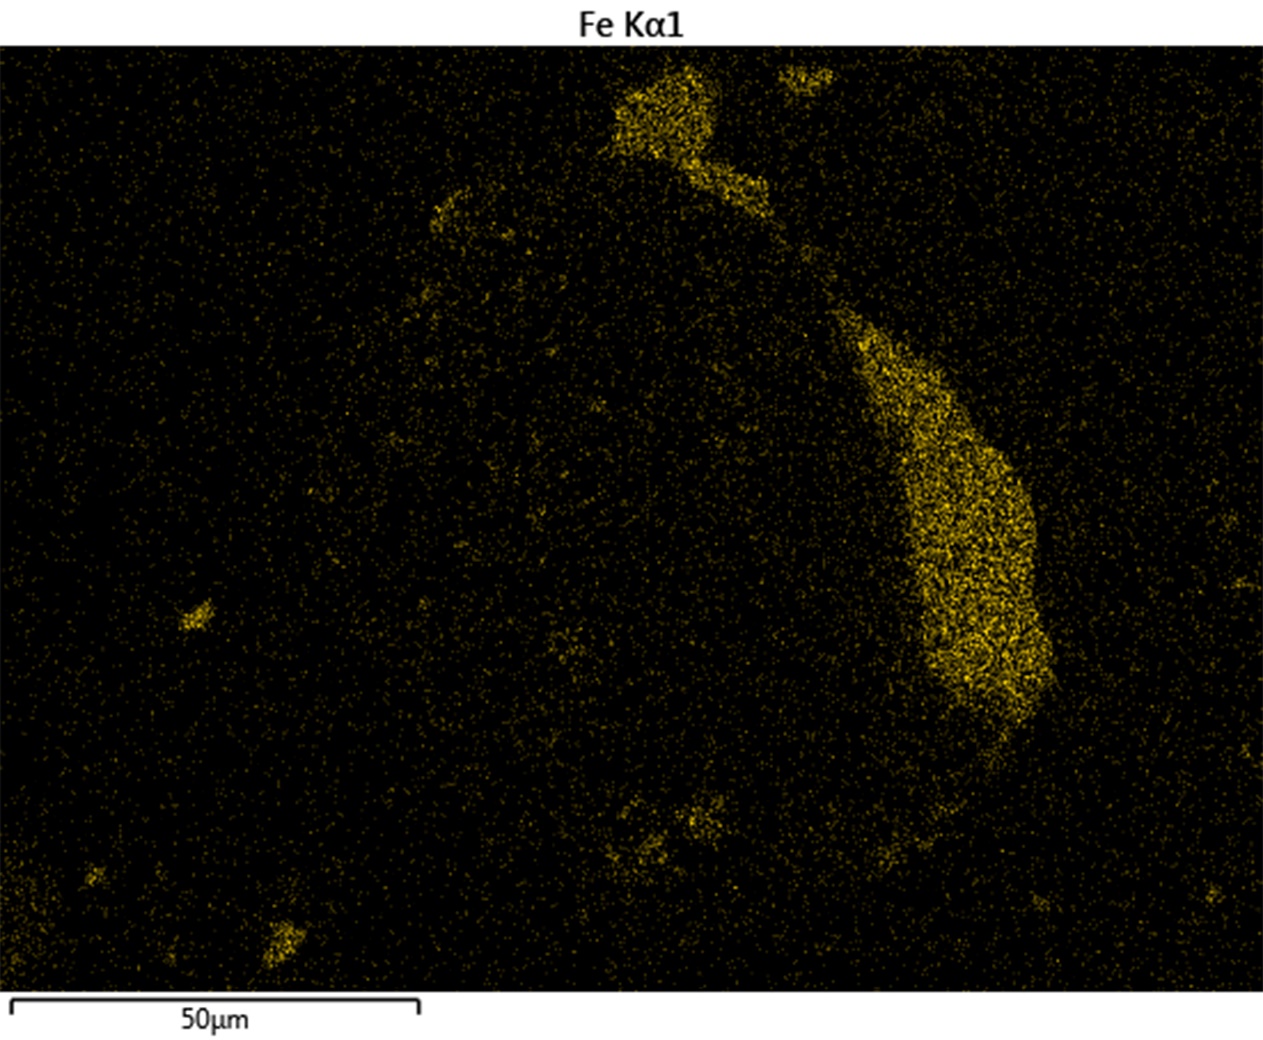


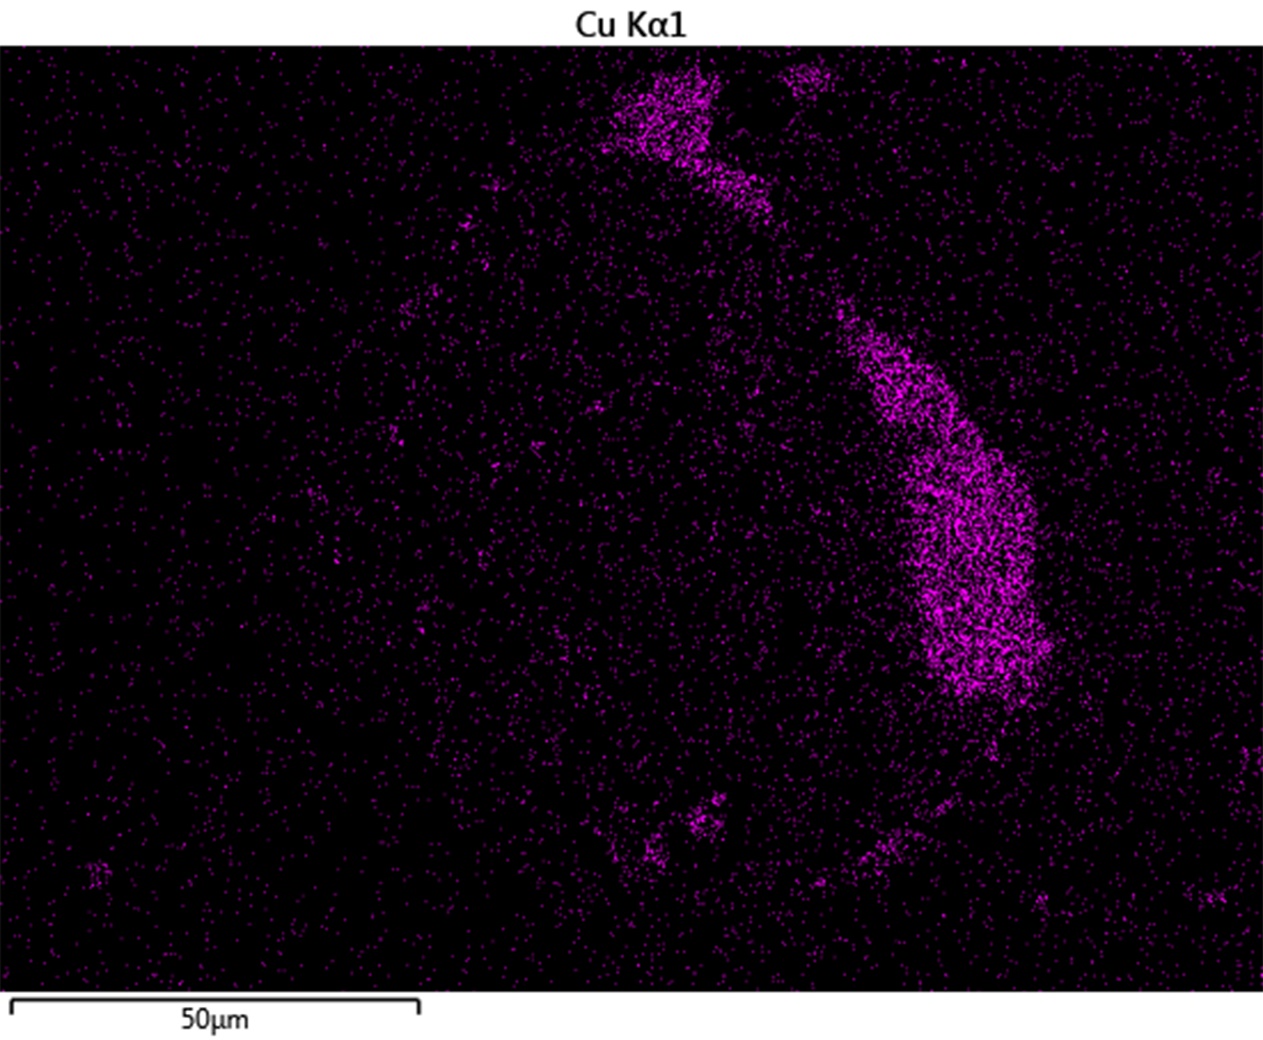


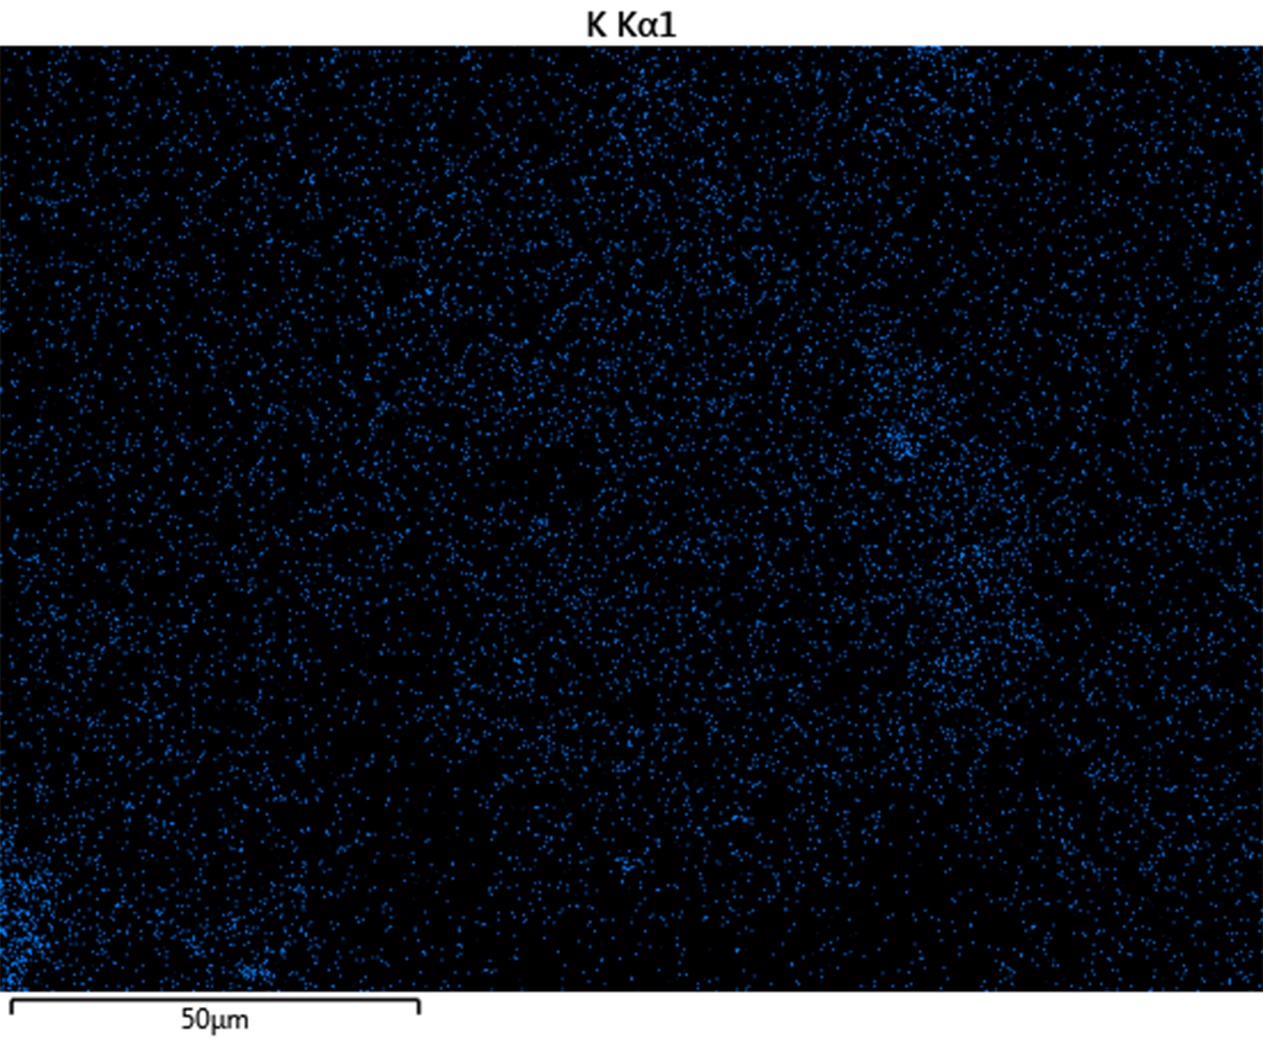


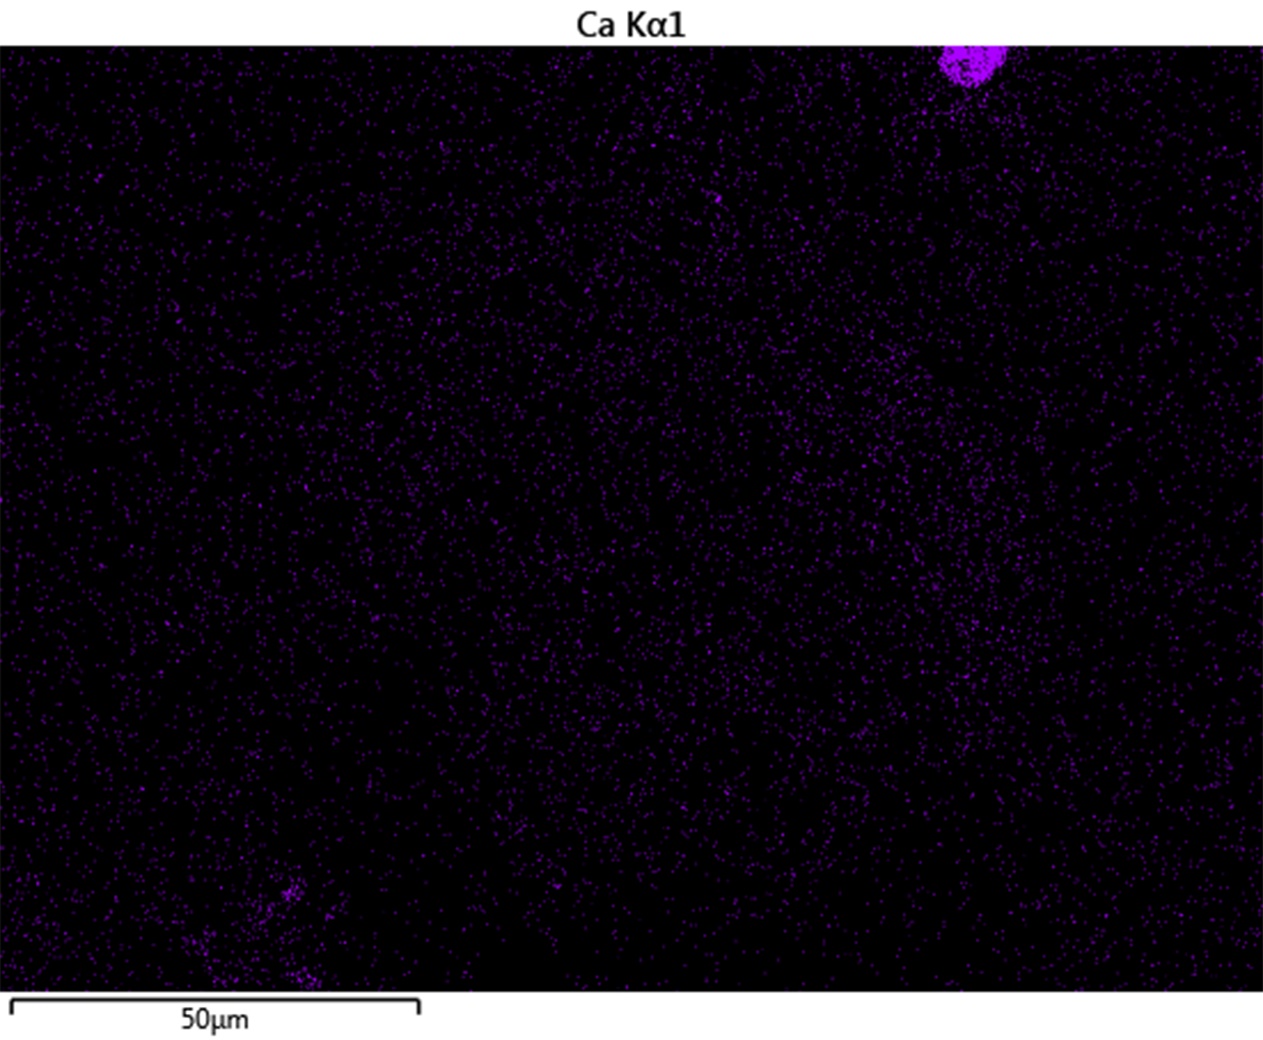


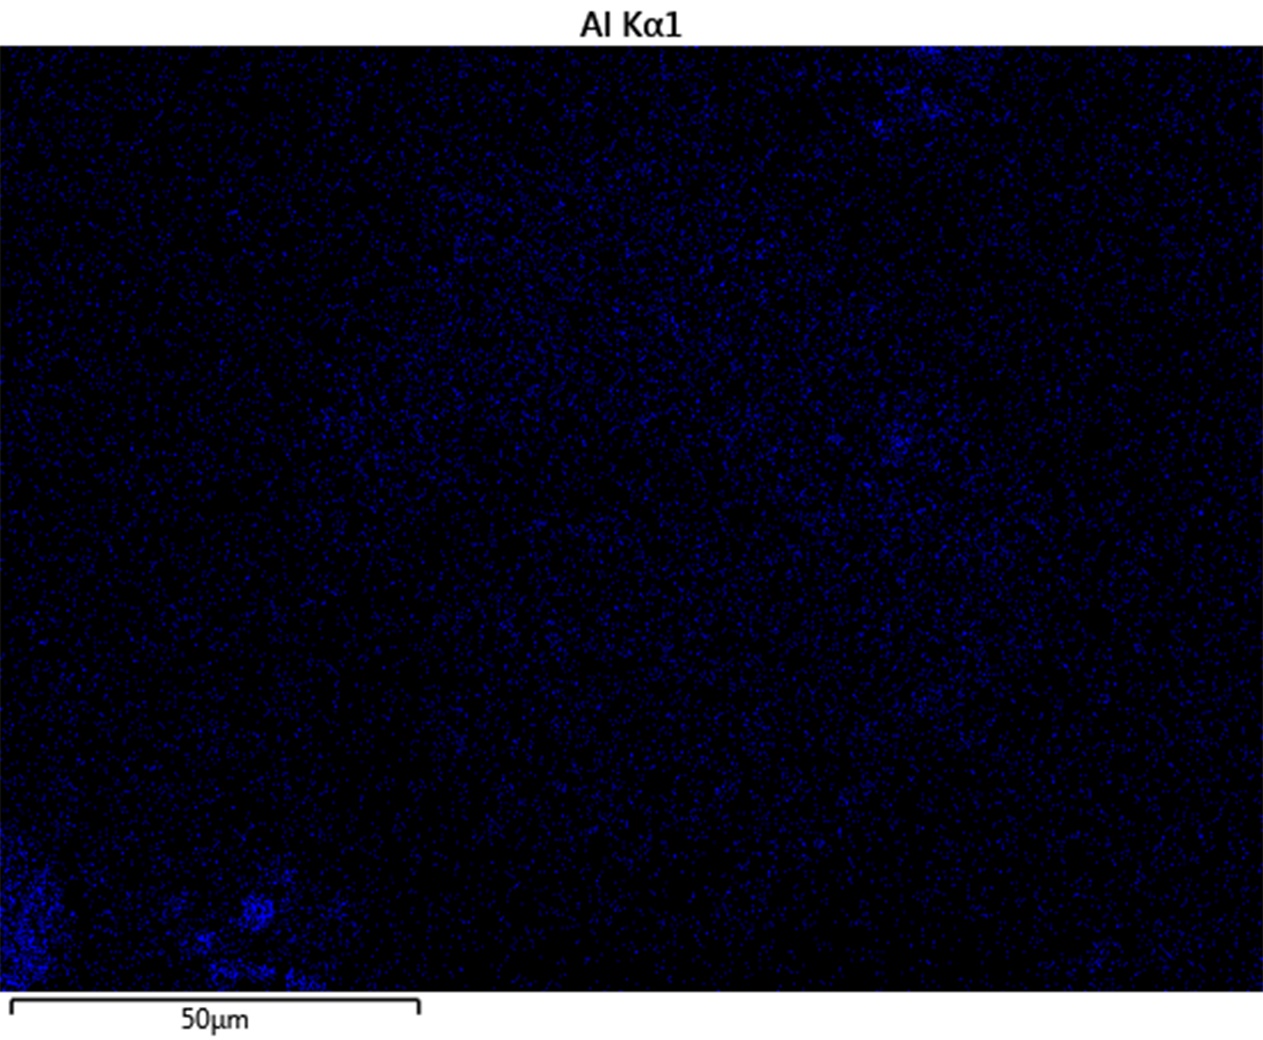


**Figure S1.** Elemental mapping of one large particle, indicating considerable mineral content. The particle contains traces of silicon, sulphur, iron, copper, potassium, calcium, and aluminium.


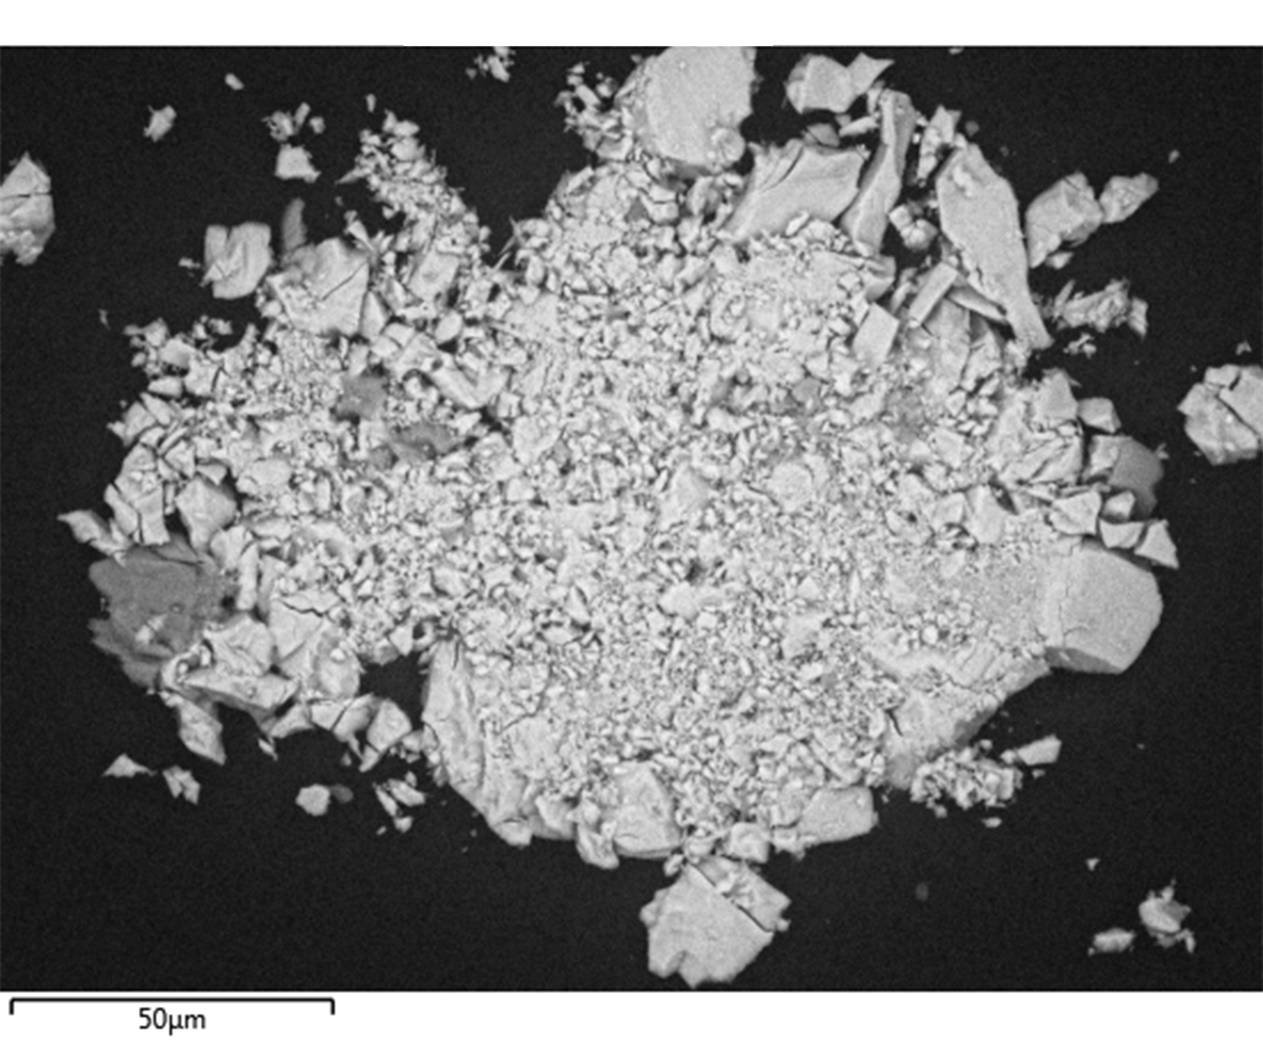


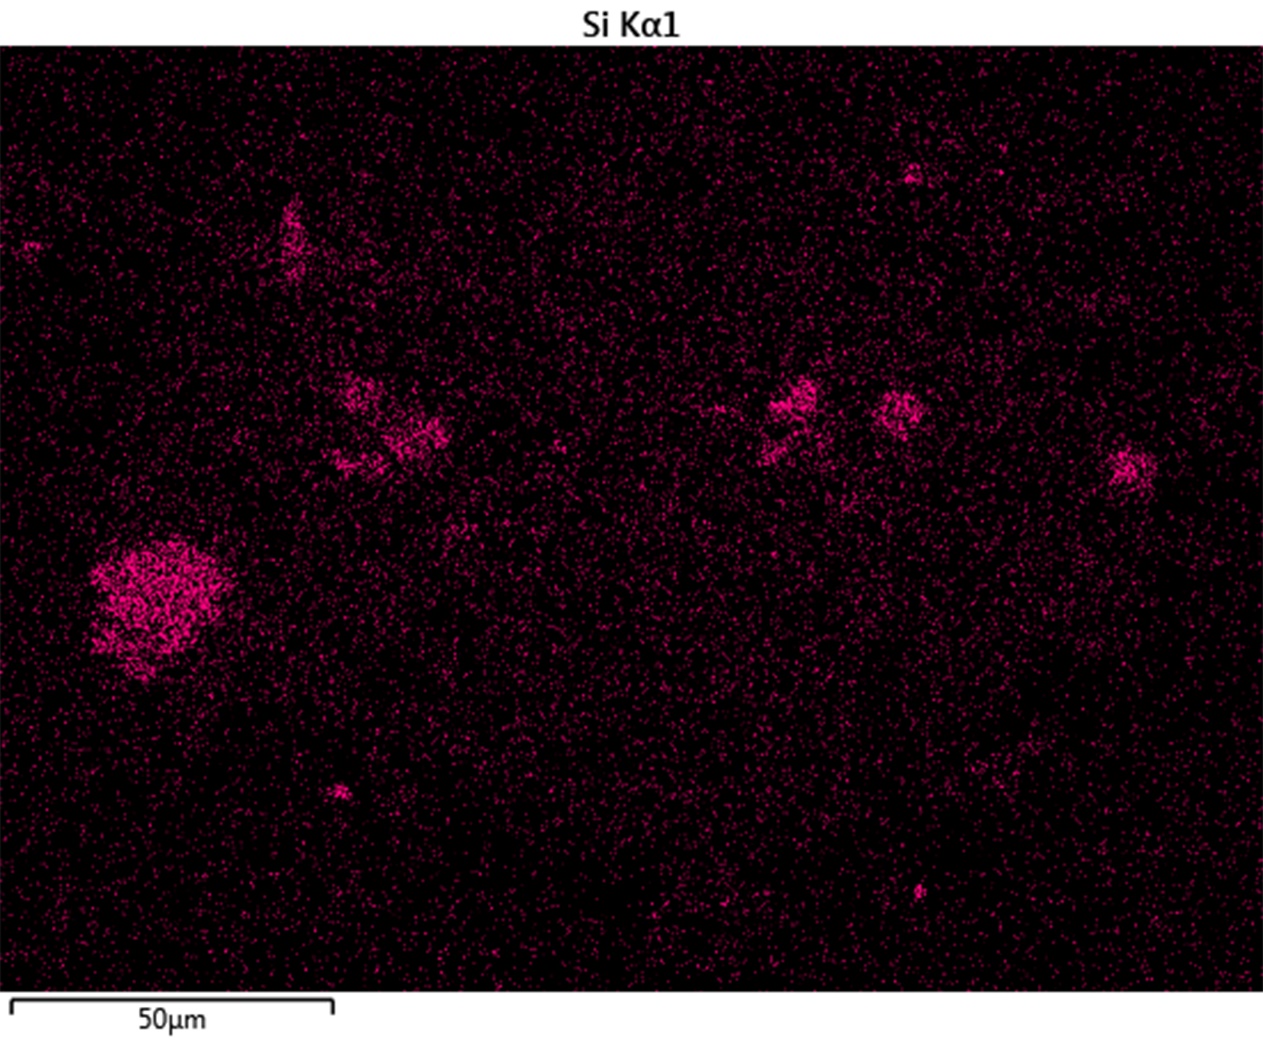


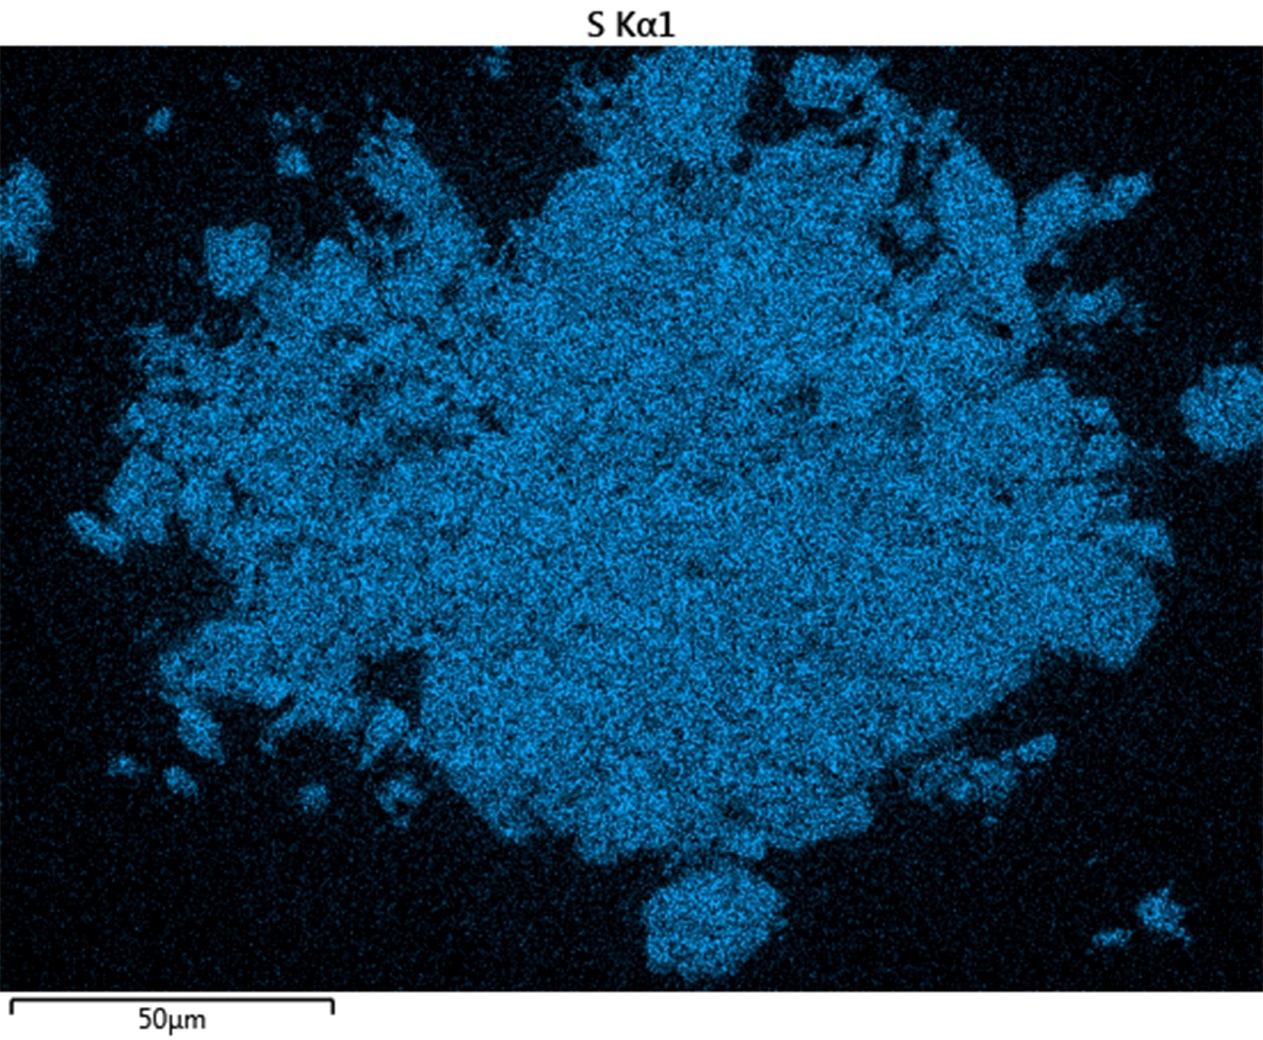


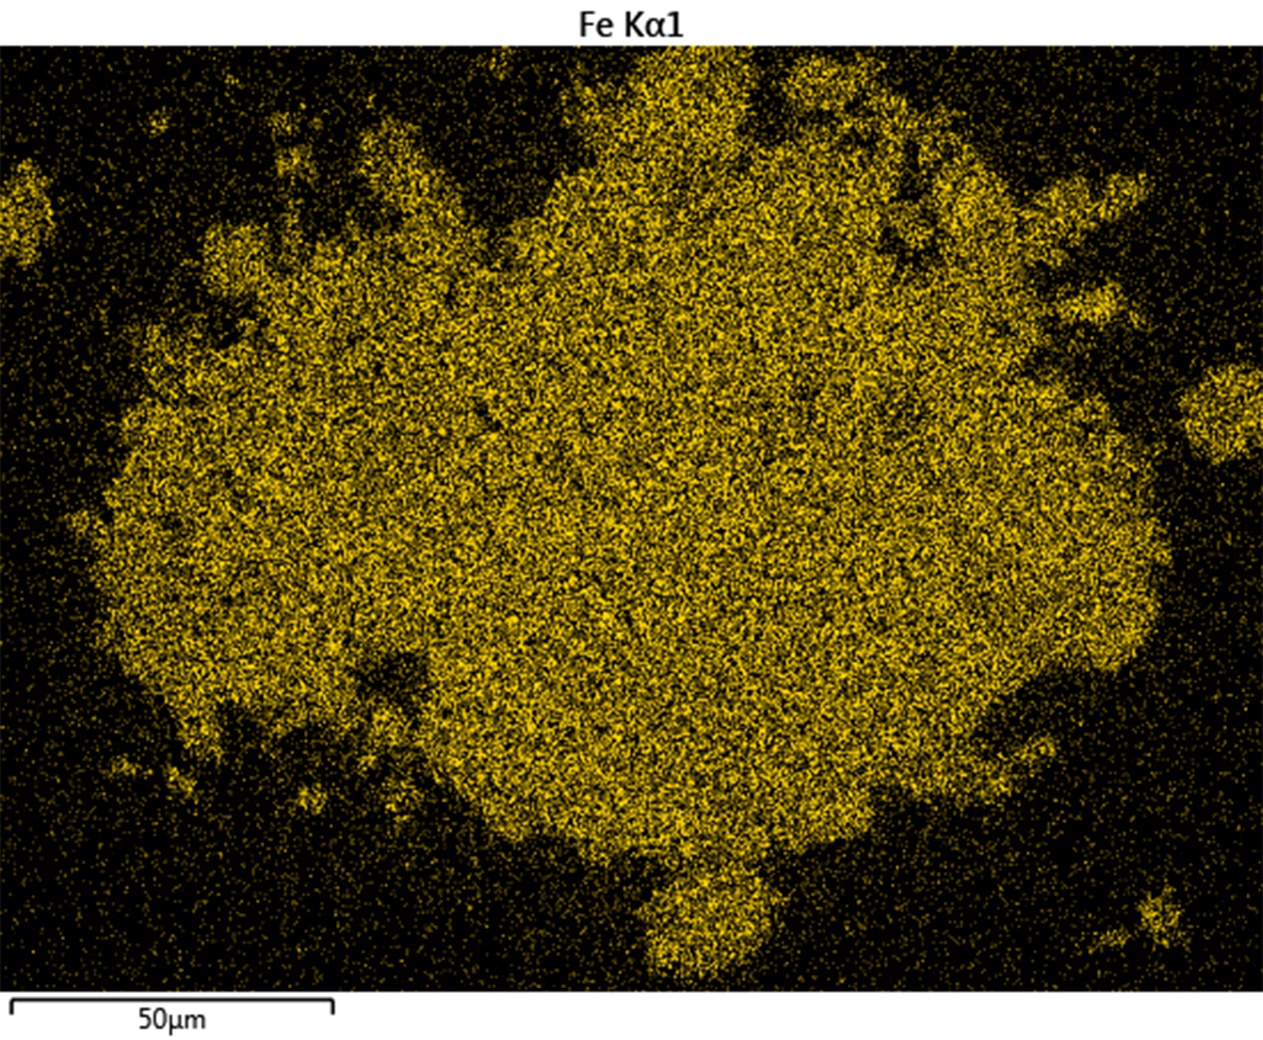


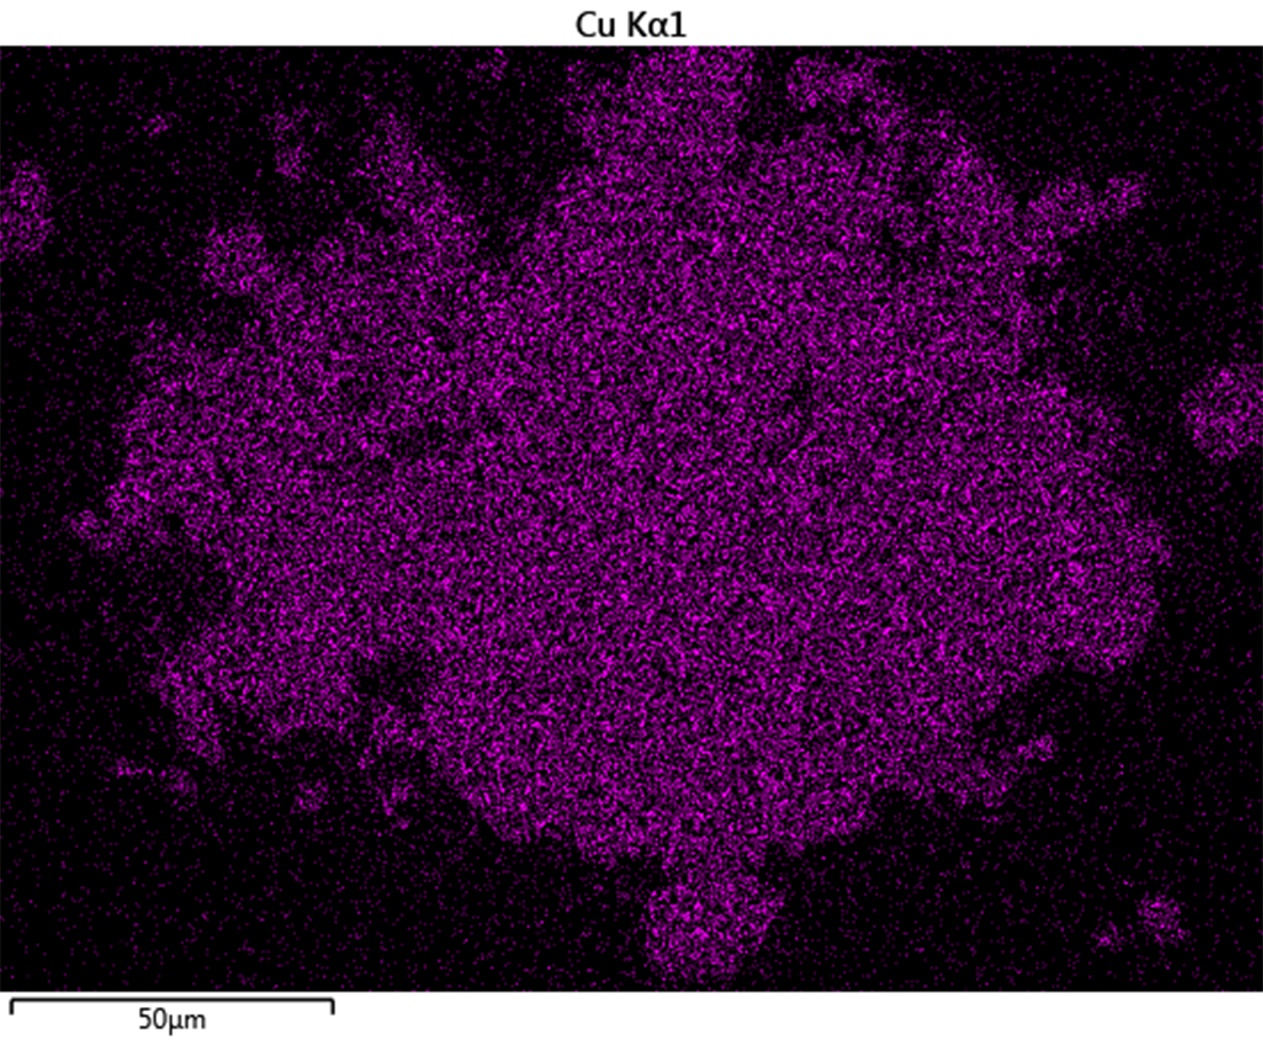


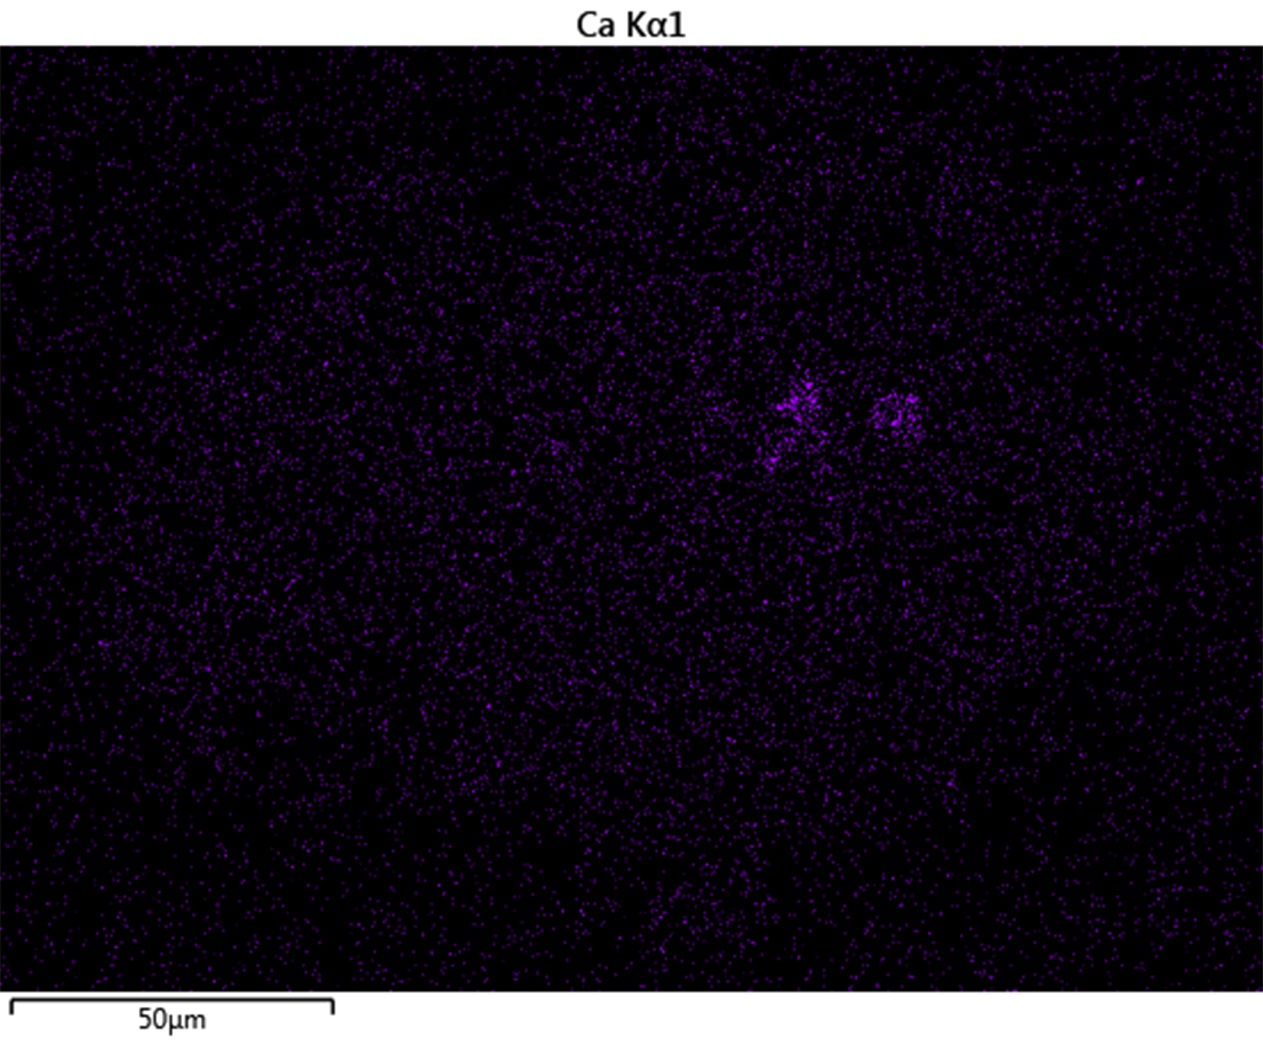


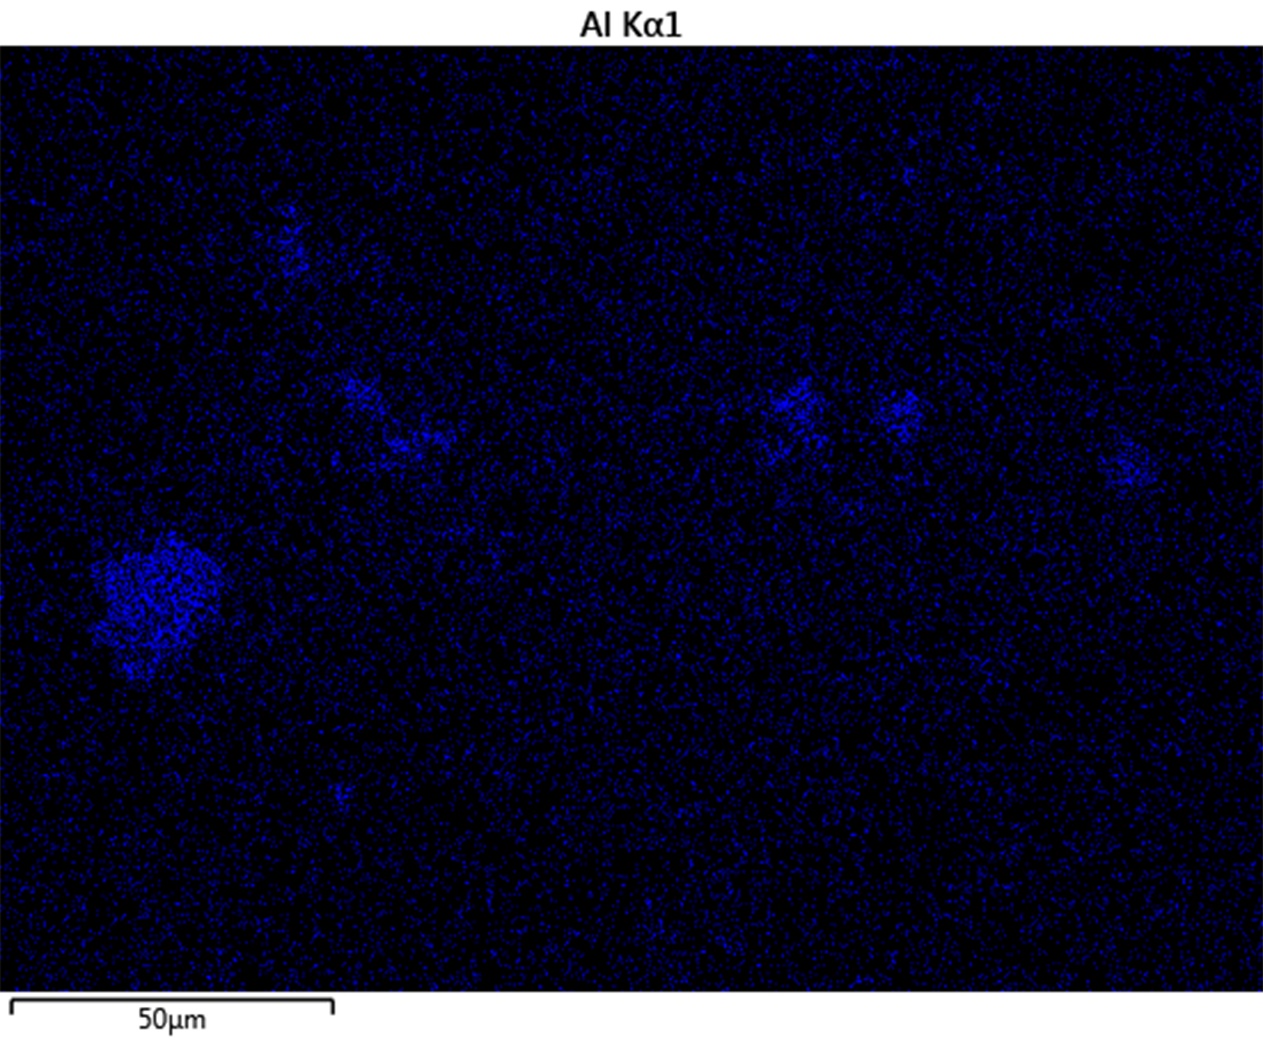


**Figure S2.** Elemental mapping of an agglomeration of particles indicating considerable mineral content. The particles contain traces of silicon, sulphur, iron, copper, calcium, and aluminium, but the EDS did not record any potassium.
